# Supplementary material for: The dynamic nature of percolation on networks with triadic interactions
Source: PubMed Central journal article supplement (PMC9998640; doi:10.1038/s41467-023-37019-5), 2023-03-10
Supplement: 41467_2023_37019_MOESM2_ESM.pdf [file 41467_2023_37019_MOESM2_ESM.pdf]

## Description of Additional Supplementary Files

**Supplementary Movie:** Movie of triadic percolation. The structural network is a Poisson networks of 20 nodes and average degree  $\langle c \rangle = 4$  and  $\langle p \rangle = 1$ . The regulatory network has Poisson positive and negative regulatory degree distribution  $\langle c^+ \rangle = 4$  and  $\langle c^- \rangle = 1$ . The coordinates of nodes in the movie are randomly assigned. Active nodes are highlighted in orange and active links are show in blue (inactive links are not shown).
